# Supplementary material for: Novel SCRG1/BST1 axis regulates self-renewal, migration, and osteogenic differentiation potential in mesenchymal stem cells
Source: PubMed Central journal article supplement — Sci Rep. 2014 Jan 13;4:3652. doi: 10.1038/srep03652 (PMC3888969; doi:10.1038/srep03652), 2014-01-13
Supplement: srep03652-s1.pdf [file srep03652-s1.pdf]

**Novel SCRG1/BST1 axis regulates  
self-renewal, migration, and osteogenic differentiation potential  
in mesenchymal stem cells**

Emiko Aomatsu<sup>1,2</sup>, Noriko Takahashi<sup>1</sup>, Shunsuke Sawada<sup>3,4</sup>, Naoto Okubo<sup>1,7</sup>,  
Tomokazu Hasegawa<sup>5</sup>, Masayuki Taira<sup>6</sup>, Hiroyuki Miura<sup>2</sup>, Akira Ishisaki<sup>1,8</sup>,  
Naoyuki Chosa<sup>1,8</sup>

<sup>1</sup>Division of Cellular Biosignal Sciences, Department of Biochemistry, Iwate Medical University,  
Yahaba, Iwate 028-3694, Japan.

<sup>2</sup>Division of Orthodontics, Department of Developmental Oral Health Science, Iwate Medical  
University School of Dentistry, Morioka, Iwate 020-8505, Japan.

<sup>3</sup>Division of Periodontology, Department of Conservative Dentistry, Iwate Medical University  
School of Dentistry, Morioka, Iwate 020-8505, Japan.

<sup>4</sup>Clinical Research Laboratory, Iwate Medical University School of Dentistry, Morioka, Iwate  
020-8505, Japan.

<sup>5</sup>Department of Pediatric Dentistry, Tokushima University Hospital, Tokushima 770-8504, Japan.

<sup>6</sup>Department of Biomedical Engineering, Iwate Medical University, Yahaba, Iwate 028-3694, Japan.

<sup>7</sup>Present address: Department of Pathophysiology and Therapeutics, Faculty of Pharmaceutical  
Sciences, Hokkaido University, Sapporo 060-0812, Japan.

<sup>8</sup>Correspondence and requests for materials should be addressed to A.I. (email:  
aishisa@iwate-med.ac.jp) or to N.C. (email: nchosa@iwate-med.ac.jp).

**Supplemental Table S1.** Genes for which expression was more than 5-fold downregulated 21 days after osteogenic induction.

| Symbol | Gene name                                             | Relative expression levels<br>compared with day 0 |       |        |        | Fold change<br>in day 21 (-) |
|--------|-------------------------------------------------------|---------------------------------------------------|-------|--------|--------|------------------------------|
|        |                                                       | Day 3                                             | Day 7 | Day 14 | Day 21 |                              |
| IL6    | interleukin 6 (interferon, beta 2)                    | 0.619                                             | 0.513 | 0.368  | 0.185  | 5.4                          |
| LDB2   | LIM domain binding 2                                  | 0.241                                             | 0.201 | 0.189  | 0.167  | 6.0                          |
| CRIP2  | cysteine-rich protein 2                               | 0.639                                             | 0.580 | 0.393  | 0.140  | 7.1                          |
| HAPLN1 | hyaluronan and proteoglycan<br>link protein 1         | 0.314                                             | 0.262 | 0.210  | 0.139  | 7.2                          |
| HAS2   | hyaluronan synthase 2                                 | 0.580                                             | 0.392 | 0.163  | 0.137  | 7.3                          |
| RDX    | radixin                                               | 0.774                                             | 0.732 | 0.384  | 0.124  | 8.0                          |
| KRT7   | keratin 7                                             | 0.869                                             | 0.273 | 0.176  | 0.118  | 8.5                          |
| EML4   | echinoderm microtubule<br>associated protein like 4   | 0.872                                             | 0.777 | 0.534  | 0.113  | 8.9                          |
| LIN7C  | lin-7 homolog C ( <i>C. elegans</i> )                 | 0.753                                             | 0.722 | 0.549  | 0.103  | 9.8                          |
| MEOX2  | mesenchyme homeobox 2                                 | 0.727                                             | 0.454 | 0.192  | 0.099  | 10.1                         |
| PRPS1  | phosphoribosyl pyrophosphate<br>synthetase 1          | 0.770                                             | 0.386 | 0.247  | 0.096  | 10.4                         |
| CKB    | creatine kinase, brain                                | 0.949                                             | 0.370 | 0.299  | 0.091  | 11.0                         |
| SEC23A | Sec23 homolog A ( <i>S. cerevisiae</i> )              | 0.900                                             | 0.803 | 0.543  | 0.070  | 14.4                         |
| RASA3  | RAS p21 protein activator 3                           | 0.643                                             | 0.608 | 0.476  | 0.065  | 15.3                         |
| BST1   | bone marrow stromal cell<br>antigen 1                 | 0.607                                             | 0.502 | 0.150  | 0.060  | 16.8                         |
| MEST   | mesoderm specific transcript<br>homolog (mouse)       | 0.506                                             | 0.216 | 0.088  | 0.057  | 17.4                         |
| PENK   | proenkephalin                                         | 0.408                                             | 0.118 | 0.062  | 0.052  | 19.3                         |
| AP4S1  | adaptor-related protein complex<br>4, sigma 1 subunit | 0.727                                             | 0.460 | 0.298  | 0.050  | 20.1                         |
| SCRG1  | scrapie responsive gene 1                             | 0.127                                             | 0.095 | 0.052  | 0.043  | 23.0                         |
| KRT14  | keratin 14                                            | 0.365                                             | 0.151 | 0.089  | 0.018  | 54.7                         |
| KRT16  | keratin 16                                            | 0.324                                             | 0.122 | 0.115  | 0.015  | 64.6                         |

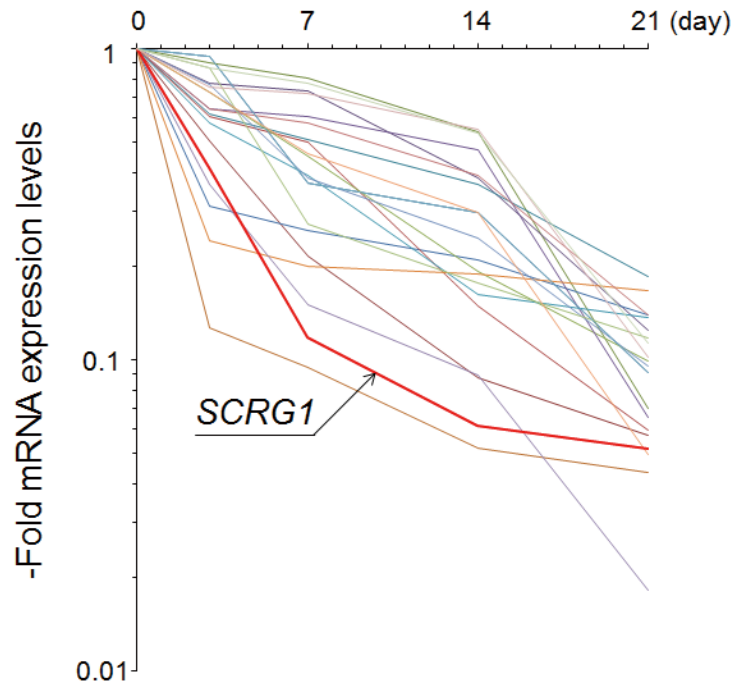

**Supplemental Figure S1: Synthesis and secretion of SCRG1 are downregulated in hMSCs after osteogenic commitment.** Whole genome expression was analyzed after 0, 3, 7, 14, and 21 days culture of primary hMSCs in osteogenic differentiation medium. Genes for which expression was more than 5-fold downregulated 21 days after osteogenic induction are represented and listed in supplementary Table S1.

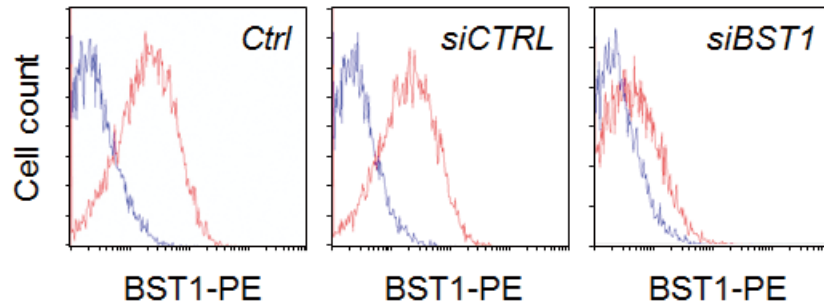

**Supplemental Figure S2: siBST1 transfection reduces expression of cell surface BST1.** Expression of cell surface BST1 was analyzed by flow cytometry of UE7T-13 cells transfected with siBST1 and treated with PE-conjugated anti-BST1 antibody. Specific antibody (red) and isotype control IgG (blue) are shown.

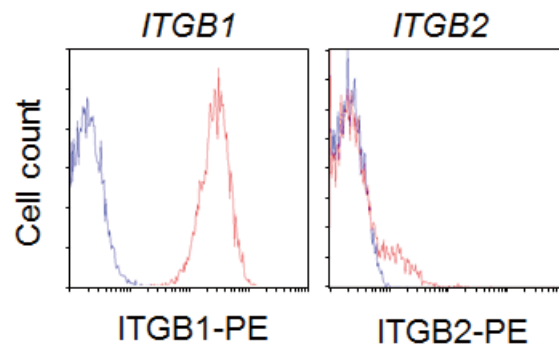

**Supplemental Figure S3: UE7T-13 cells do not express  $\beta 2$  integrin.** UE7T-13 cells were incubated with anti- $\beta 1$  integrin and anti- $\beta 2$  integrin antibodies for 1 h at 4°C. The cells were then incubated with PE-conjugated secondary antibody for 1 h at 4°C in the dark. Acquisition was performed using an EPICS XL ADC System. Specific antibody (red) and isotype control IgG (blue) are shown.

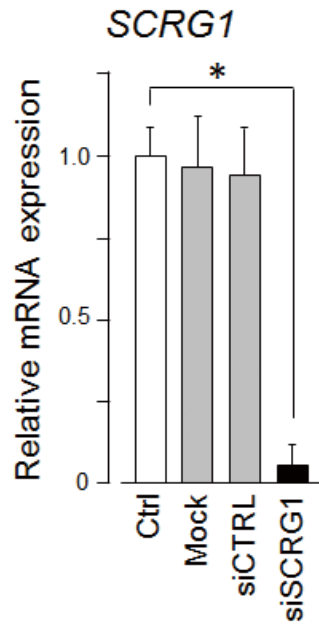

**Supplemental Figure S4: siRNA against SCRG1 clearly knocked down the mRNA expression level.** UE7T-13 cells were transfected with siRNA for SCRG1 (siSCRG1). mRNA expression of SCRG1 was measured by qRT-PCR and normalized to GAPDH; results are expressed as fold increase or decrease relative to the control (Ctrl). Data are presented as mean  $\pm$  SD. \* $p < 0.05$  was considered significant.

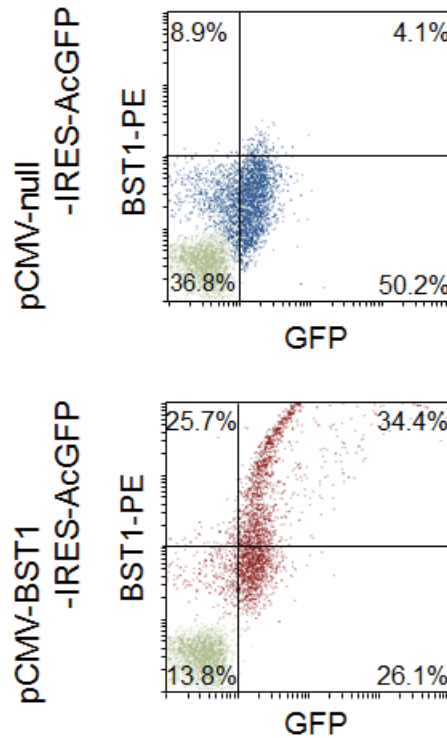

**Supplemental Figure S5: The transfection efficiencies of pCMV-BST1-IRES-AcGFP and pCMV-null-IRES-AcGFP into UE7T-13 cells.**

UE7T-13 cells were transfected with pCMV-null-IRES-AcGFP (upper panels) or pCMV-BST1-IRES-AcGFP (lower panels). BST1 and GFP expression was investigated by flow cytometry. Bicistronic vector pCMV-BST1-IRES-AcGFP simultaneously express the same mRNA transcript of BST1 and AcGFP genes. Therefore, BST1 overexpressing cells transfected with pCMV-BST1-IRES-AcGFP were detected as GFP-positive cells.

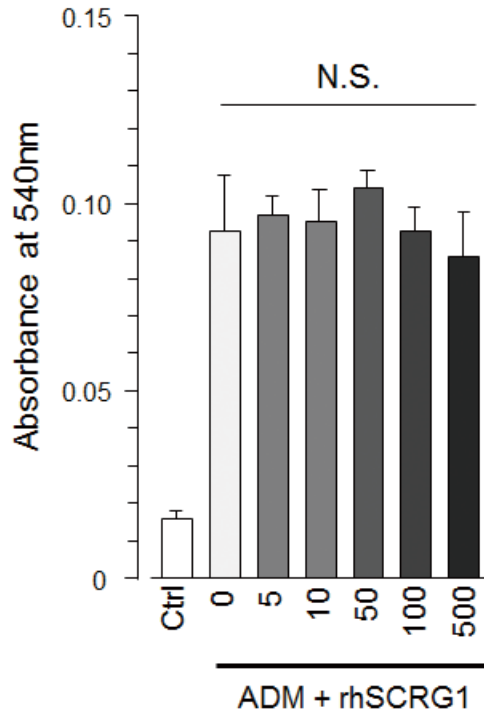

**Supplemental Figure S6: Adipogenic differentiation of UE7T-13 cells was not suppressed by SCR1.** UE7T-13 cells were cultured in adipogenic differentiation medium (ADM) containing various concentrations of rhSCR1 (5-500 ng/mL). After 2 weeks, lipid droplets were stained with Oil Red O, extracted with DMSO, and absorbance was measured at 540 nm.



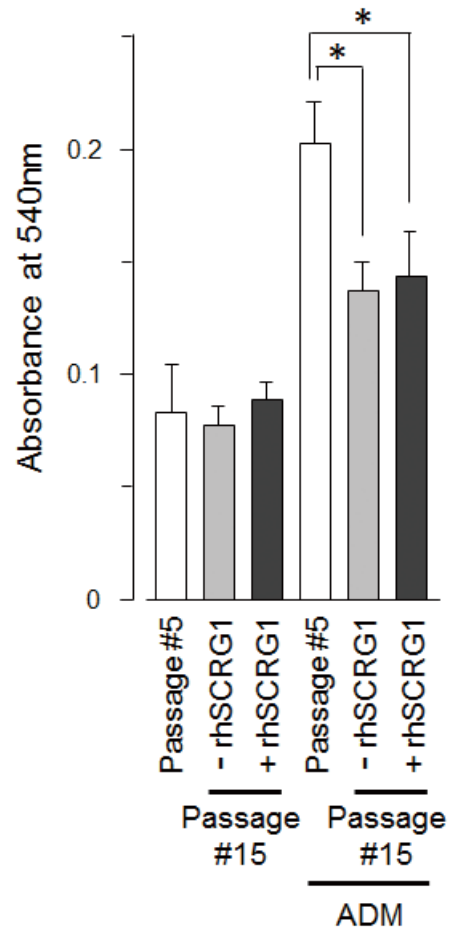

**Supplemental Figure S7: Adipogenic differentiation of hMSCs was not preserved**

**by SCRG1 after *ex vivo* expansion.** Primary cultured hMSCs (passage #5) were subcultured ten times in the presence (passage #15 +rhSCRG1) or absence (passage #15 -rhSCRG1) of 500 ng/mL rhSCRG1. The cells were cultured in adipogenic differentiation medium (ADM). After 2 weeks, lipid droplets were stained with Oil Red O staining, extracted with DMSO, and absorbance was measured at 540 nm.

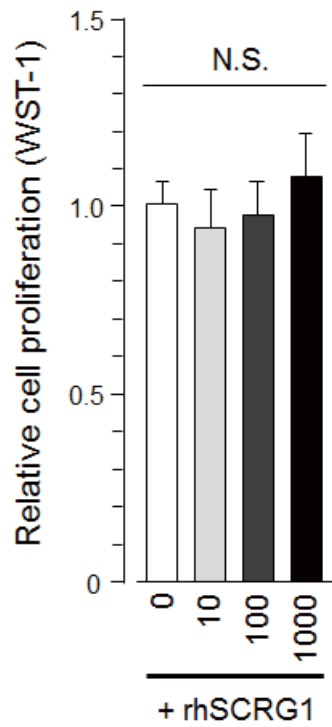

**Supplemental Figure S8: Cell proliferation activity was not affected by the addition of rhSCRG1 in UE7T-13 cells.** UE7T-13 cells were cultured in growth medium containing various concentrations of rhSCRG1 (0–1000 ng/mL) on 96-well culture plates for 5 days. After incubation periods, proliferation was evaluated by WST-1 assay.

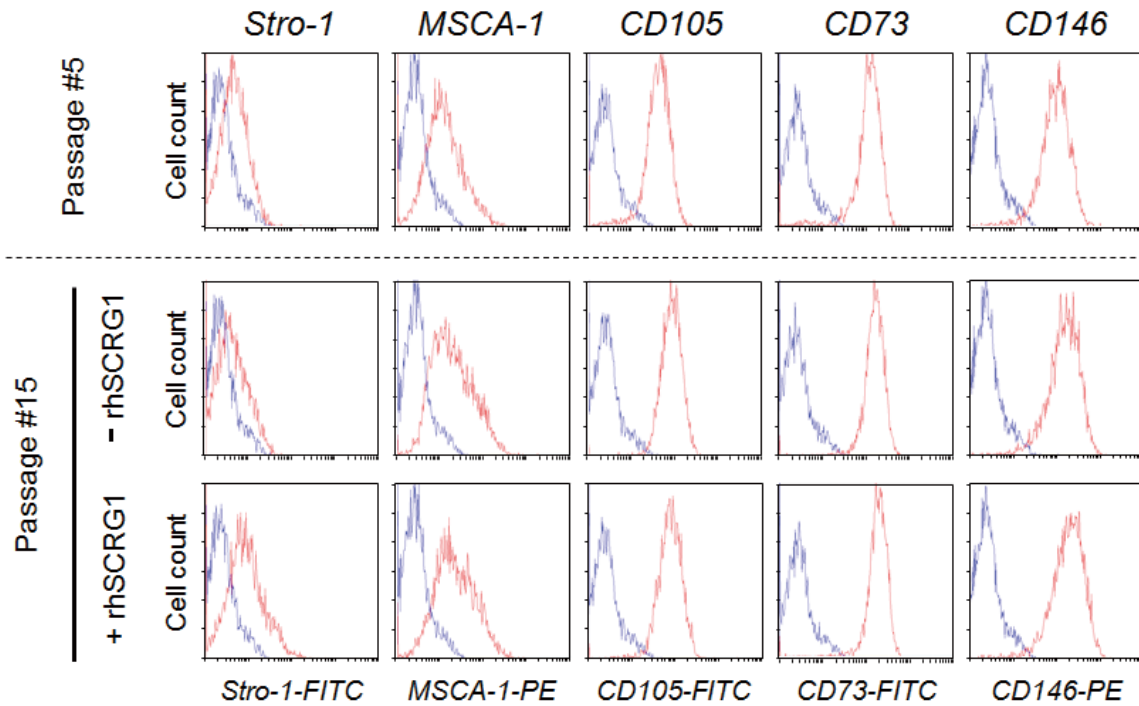

**Supplemental Figure S9: Expression of hMSC markers Stro-1, MSCA-1, CD73, CD105, and CD146 were unchanged by long-term culture.** Primary cultured hMSCs (passage #5) were subcultured ten times in the presence (passage #15, +rhSCRG1) or absence (passage #15, -rhSCRG1) of 500 ng/mL rhSCRG1. Expression of Stro-1, MSCA-1, CD73, CD105, and CD146 was examined by flow cytometry with FITC- or PE-conjugated specific antibodies. Specific antibody (red) and isotype control IgG (blue) are shown.

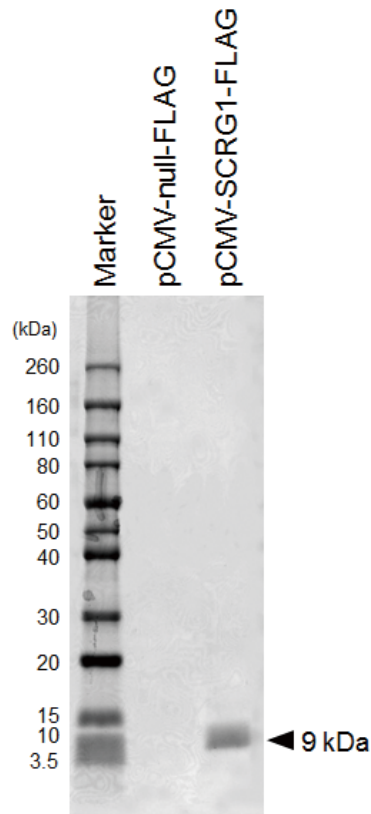

**Supplemental Figure S10: Purified rhSCRG1 was detected as a single 9-kDa band in SDS-PAGE.** C-terminal FLAG-tagged recombinant human SCR1 (rhSCR1) was produced by a pSCR1-FLAG vector and FreeStyle MAX 293 Expression System. rhSCR1 secreted into the culture medium from HEK293F cells was purified by anti-FLAG M2 Agarose Affinity Gel. The purified rhSCR1 was separated and analyzed by SDS-PAGE and CBB staining.
